# Supplementary material
Source: PubMed Central journal article supplement (PMC1821053)

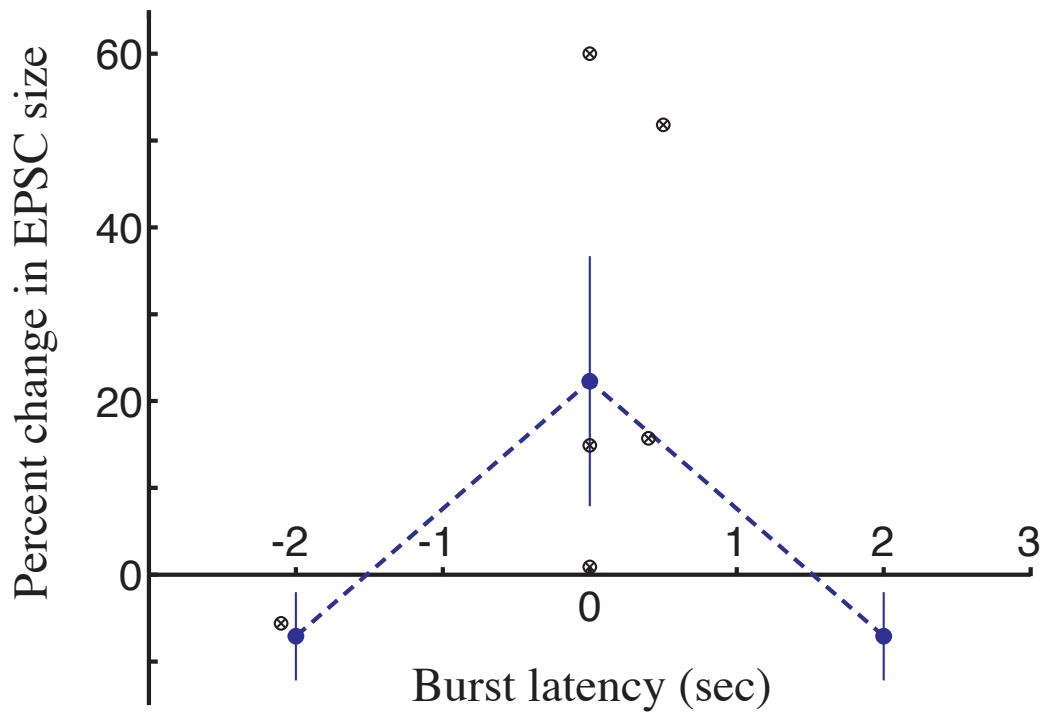

Supplement: pbio.0050061.sg001.pdf [file pbio.0050061.sg001.pdf]
